# Supplementary material for: Application of the automated haematology analyzer XN-30 for discovery and development of anti-malarial drugs
Source: Springer Nature journal article supplement (doi:10.1186/s12936-019-2642-0), 2019-01-14
Supplement: MOESM2 [file 16396420]

**Table S1: Parasitaemia of each parasite culture treated with anti-malarial drugs**

|      | RBC% | ART   | AV    | CQ    | MQ    | PYR   | DMSO  |
|------|------|-------|-------|-------|-------|-------|-------|
| 24 h | RNG  | 1.493 | 1.588 | 1.134 | 1.317 | 0.652 | 0.647 |
|      | TRPZ | 0.228 | 0.205 | 0.172 | 0.554 | 1.277 | 0.656 |
|      | SCHZ | 0.010 | 0.010 | 0.010 | 0.012 | 0.038 | 0.710 |
| 48 h | RNG  | 1.546 | 1.520 | 1.270 | 1.128 | 0.452 | 7.427 |
|      | TRPZ | 0.261 | 0.295 | 0.142 | 0.663 | 1.321 | 1.296 |
|      | SCHZ | 0.016 | 0.013 | 0.011 | 0.050 | 0.045 | 0.234 |

ART, artemisinin; AV, atovaquone; CQ, chloroquine; MQ, mefloquine; and PYR, pyrimethamine.  
RNG, ring-form; TRPZ, trophozoite; and SCHZ, schizont.

**Table S2: Growth inhibition rate of parasites treated with anti-malarial drugs**

| 3D7 strain | Concentration | Growth inhibition (%) | Mean  | SD** | Concentration | Growth inhibition (%) | Mean  | SD**      | Concentration | Growth inhibition (%) | Mean    | SD**      | Concentration | Growth inhibition (%) | Mean | SD**      | Concentration | Growth inhibition (%) | Mean  | SD** |         |       |       |      |       |       |       |       |       |      |      |
|------------|---------------|-----------------------|-------|------|---------------|-----------------------|-------|-----------|---------------|-----------------------|---------|-----------|---------------|-----------------------|------|-----------|---------------|-----------------------|-------|------|---------|-------|-------|------|-------|-------|-------|-------|-------|------|------|
| ART*       | 5 μM          | 98.8                  | 99.5  | 0.90 | AV*           | 97.9                  | 98.5  | 0.40      | CQ*           | 108.3                 | 106.2   | 2.8       | MQ*           | 99.7                  | 98.7 | 0.85      | PYR*          | 98.2                  | 97.8  | 0.31 |         |       |       |      |       |       |       |       |       |      |      |
|            |               | 99.0                  |       |      |               |                       |       |           |               |                       |         |           |               |                       |      |           |               |                       |       |      | 98.7    | 108.0 | 98.7  | 97.6 | 97.4  | 97.7  |       |       |       |      |      |
|            |               | 100.8                 |       |      |               |                       |       |           |               |                       |         |           |               |                       |      |           |               |                       |       |      | 98.8    | 102.3 | 97.6  | 97.6 | 97.4  | 97.7  |       |       |       |      |      |
|            | 1.5 μM        | 100.1                 | 100.2 | 0.64 |               | 98.3                  | 99.2  | 98.5      |               | 0.57                  | 99.9    | 100.8     |               | 101.1                 | 1.2  | 100.8     |               | 101.6                 | 101.6 | 0.59 | 100.8   | 97.4  | 97.7  | 0.45 |       |       |       |       |       |      |      |
|            |               | 101.0                 |       |      |               |                       |       |           |               |                       |         |           |               |                       |      |           |               |                       |       |      |         |       |       |      | 98.4  | 101.5 | 99.7  | 97.4  | 97.1  | 97.0 |      |
|            |               | 99.5                  |       |      |               |                       |       |           |               |                       |         |           |               |                       |      |           |               |                       |       |      |         |       |       |      | 97.8  | 102.7 | 97.6  | 97.4  | 97.1  | 97.0 |      |
|            | 0.5 μM        | 98.5                  | 99.3  | 0.80 |               | 96.4                  | 97.0  | 97.2      |               | 0.84                  | 101.6   | 103.6     |               | 102.3                 | 0.94 | 0.5 μM    |               | 101.3                 | 99.3  | 1.6  | 0.5 μM  | 97.1  | 97.7  | 0.28 |       |       |       |       |       |      |      |
|            |               | 100.4                 |       |      |               |                       |       |           |               |                       |         |           |               |                       |      |           |               |                       |       |      |         |       |       |      | 98.4  | 101.5 | 99.7  | 97.4  | 97.1  | 97.0 |      |
|            |               | 99.1                  |       |      |               |                       |       |           |               |                       |         |           |               |                       |      |           |               |                       |       |      |         |       |       |      | 98.5  | 100.9 | 96.7  | 97.4  | 97.1  | 97.0 |      |
|            | 0.15 μM       | 52.6                  | 49.4  | 2.8  |               | 99.9                  | 99.9  | 99.0      |               | 0.65                  | 100.1   | 100.1     |               | 100.3                 | 0.40 | 0.15 μM   |               | 97.8                  | 97.0  | 0.54 | 0.15 μM | 90.2  | 90.8  | 1.7  |       |       |       |       |       |      |      |
|            |               | 45.9                  |       |      |               |                       |       |           |               |                       |         |           |               |                       |      |           |               |                       |       |      |         |       |       |      | 98.6  | 100.0 | 97.8  | 97.6  | 97.1  | 97.0 |      |
|            |               | 49.8                  |       |      |               |                       |       |           |               |                       |         |           |               |                       |      |           |               |                       |       |      |         |       |       |      | 86.8  | 99.1  | 16.9  | 97.6  | 97.1  | 97.0 |      |
| 0.05 μM    | 0.62          | 4.1                   | 4.5   | 96.2 | 96.2          | 92.7                  | 4.2   | 99.1      | 99.1          | 99.0                  | 0.19    | 0.15 μM   | 14.9          | 18.1                  | 3.2  | 0.05 μM   | 73.8          | 71.3                  | 72.4  | 1.0  |         |       |       |      |       |       |       |       |       |      |      |
|            | 1.2           |                       |       |      |               |                       |       |           |               |                       |         |           |               |                       |      |           |               |                       |       |      | 95.0    | 99.0  | 22.5  | 71.3 | 71.3  | 71.3  |       |       |       |      |      |
|            | 10.5          |                       |       |      |               |                       |       |           |               |                       |         |           |               |                       |      |           |               |                       |       |      | 22.4    | 29.4  | 7.0   | 72.2 | 72.2  | 72.2  |       |       |       |      |      |
| 0.015 μM   | -2.5          | 0.13                  | 2.5   | 22.7 | 22.7          | 19.6                  | 4.2   | 0.075 μM  | 19.1          | 23.8                  | 4.2     | 0.1 μM    | 10.5          | 6.8                   | 3.1  | 0.015 μM  | 14.4          | 8.2                   | 10.6  | 2.7  |         |       |       |      |       |       |       |       |       |      |      |
|            | 3.4           |                       |       |      |               |                       |       |           |               |                       |         |           |               |                       |      |           |               |                       |       |      | 13.7    | 7.9   | 23.0  | 2.8  | 9.1   | 9.1   |       |       |       |      |      |
|            | -0.49         |                       |       |      |               |                       |       |           |               |                       |         |           |               |                       |      |           |               |                       |       |      | 7.9     | 6.4   | -0.9  | 2.8  | 9.1   | 9.1   |       |       |       |      |      |
| 0.005 μM   | 5.0           | 0.94                  | 3.0   | 5.7  | 5.7           | 6.2                   | 1.3   | 0.005 μM  | 6.4           | 4.3                   | 3.7     | 0.05 μM   | -1.3          | -0.87                 | 0.9  | 0.005 μM  | -4.5          | 5.1                   | -0.19 | 4.0  |         |       |       |      |       |       |       |       |       |      |      |
|            | -0.32         |                       |       |      |               |                       |       |           |               |                       |         |           |               |                       |      |           |               |                       |       |      | 4.9     | 4.4   | 0.3   | 0.3  | -1.1  | -1.1  |       |       |       |      |      |
|            | -1.9          |                       |       |      |               |                       |       |           |               |                       |         |           |               |                       |      |           |               |                       |       |      | -4.5    | 4.4   | 0.3   | 0.3  | -1.1  | -1.1  |       |       |       |      |      |
| 0.0015 μM  | -1.0          | -0.64                 | 0.31  | 4.4  | 4.4           | 0.53                  | 3.7   | 0.0015 μM | 1.1           | 2.2                   | 2.1     | 0.015 μM  | 1.8           | 0.70                  | 0.8  | 0.0015 μM | -2.5          | -4.4                  | -2.0  | 2.1  |         |       |       |      |       |       |       |       |       |      |      |
|            | -0.25         |                       |       |      |               |                       |       |           |               |                       |         |           |               |                       |      |           |               |                       |       |      | 1.7     | 1.1   | -2.1  | 0.3  | 0.8   | 0.8   |       |       |       |      |      |
|            | -0.67         |                       |       |      |               |                       |       |           |               |                       |         |           |               |                       |      |           |               |                       |       |      | 1.7     | 1.1   | -2.2  | 0.3  | 0.8   | 0.8   |       |       |       |      |      |
| W2 strain  | 5 μM          | 99.9                  | 100.2 | 0.94 | AV*           | 98.7                  | 98.7  | 0.55      | CQ*           | 109.3                 | 107.6   | 2.3       | MQ*           | 97.9                  | 98.9 | 0.89      | PYR*          | 14.8                  | 16.7  | 14.3 | 2.3     |       |       |      |       |       |       |       |       |      |      |
|            |               | 101.4                 |       |      |               |                       |       |           |               |                       |         |           |               |                       |      |           |               |                       |       |      |         | 99.8  | 104.4 | 98.6 | 98.6  | 16.7  | 16.7  |       |       |      |      |
|            |               | 99.2                  |       |      |               |                       |       |           |               |                       |         |           |               |                       |      |           |               |                       |       |      |         | 99.8  | 109.2 | 98.6 | 100.1 | 11.3  | 11.3  |       |       |      |      |
|            | 1.5 μM        | 100.2                 | 100.4 | 0.15 |               | 100.0                 | 100.0 | 99.2      |               | 0.93                  | 1.5 μM  | 23.7      |               | 23.7                  | 1.3  | 1.5 μM    |               | 101.0                 | 100.8 | 0.40 | 1.5 μM  | 6.2   | 3.5   | 2.0  |       |       |       |       |       |      |      |
|            |               | 100.4                 |       |      |               |                       |       |           |               |                       |         |           |               |                       |      |           |               |                       |       |      |         |       |       |      | 97.9  | 22.2  | 101.1 | 100.2 | 1.6   | 1.6  |      |
|            |               | 100.6                 |       |      |               |                       |       |           |               |                       |         |           |               |                       |      |           |               |                       |       |      |         |       |       |      | 100.3 | 7.0   | 101.1 | 100.2 | 1.6   | 1.6  |      |
|            | 0.5 μM        | 100.1                 | 100.5 | 0.42 |               | 97.8                  | 97.8  | 99.2      |               | 1.0                   | 0.5 μM  | 5.3       |               | 2.7                   | 4.9  | 0.5 μM    |               | 100.6                 | 100.8 | 0.17 | 0.5 μM  | -0.5  | -0.9  | -1.6 | 1.3   |       |       |       |       |      |      |
|            |               | 100.3                 |       |      |               |                       |       |           |               |                       |         |           |               |                       |      |           |               |                       |       |      |         |       |       |      |       | 99.6  | -4.2  | 100.7 | 100.6 | -3.4 | -3.4 |
|            |               | 101.0                 |       |      |               |                       |       |           |               |                       |         |           |               |                       |      |           |               |                       |       |      |         |       |       |      |       | 99.1  | 4.4   | 100.7 | 100.6 | -3.4 | -3.4 |
|            | 0.15 μM       | 100.4                 | 100.6 | 0.23 |               | 97.8                  | 97.8  | 98.5      |               | 0.54                  | 0.15 μM | -9.9      |               | -3.2                  | 5.9  | 0.15 μM   |               | 99.6                  | 100.0 | 0.42 | 0.15 μM | -4.2  | -6.0  | -5.7 | 1.2   |       |       |       |       |      |      |
|            |               | 100.9                 |       |      |               |                       |       |           |               |                       |         |           |               |                       |      |           |               |                       |       |      |         |       |       |      |       | 98.6  | -4.0  | 99.6  | 99.8  | -7.0 | -7.0 |
|            |               | 100.5                 |       |      |               |                       |       |           |               |                       |         |           |               |                       |      |           |               |                       |       |      |         |       |       |      |       | 98.2  | 4.7   | 99.6  | 99.8  | -7.0 | -7.0 |
| 0.05 μM    | 89.0          | 88.1                  | 0.69  | 99.3 | 99.3          | 98.7                  | 0.45  | 0.05 μM   | 0.9           | 1.8                   | 2.1     | 0.05 μM   | 78.7          | 67.9                  | 8.7  | 0.05 μM   | -4.2          | -4.4                  | -4.7  | 0.60 |         |       |       |      |       |       |       |       |       |      |      |
|            | 87.5          |                       |       |      |               |                       |       |           |               |                       |         |           |               |                       |      |           |               |                       |       |      | 98.6    | -0.1  | 67.5  | 67.5 | -5.5  | -5.5  |       |       |       |      |      |
|            | 87.7          |                       |       |      |               |                       |       |           |               |                       |         |           |               |                       |      |           |               |                       |       |      | 88.3    | 3.1   | 67.5  | 67.5 | -5.5  | -5.5  |       |       |       |      |      |
| 0.015 μM   | 17.5          | 14.0                  | 3.0   | 77.6 | 77.6          | 83.3                  | 4.4   | 0.015 μM  | 1.7           | -1.0                  | 4.8     | 0.015 μM  | 14.8          | 14.4                  | 0.35 | 0.015 μM  | 2.7           | -6.3                  | -4.7  | 5.5  |         |       |       |      |       |       |       |       |       |      |      |
|            | 10.0          |                       |       |      |               |                       |       |           |               |                       |         |           |               |                       |      |           |               |                       |       |      | 77.7    | -1.4  | 14.6  | 14.6 | -10.5 | -10.5 |       |       |       |      |      |
|            | 14.4          |                       |       |      |               |                       |       |           |               |                       |         |           |               |                       |      |           |               |                       |       |      | 47.7    | 1.9   | 14.6  | 14.6 | -10.5 | -10.5 |       |       |       |      |      |
| 0.005 μM   | 3.9           | 4.2                   | 1.5   | 41.6 | 41.6          | 44.3                  | 2.5   | 0.005 μM  | -3.7          | -1.1                  | 2.3     | 0.005 μM  | -2.6          | -0.36                 | 3.8  | 0.005 μM  | 3.7           | 0.13                  | 4.1   |      |         |       |       |      |       |       |       |       |       |      |      |
|            | 2.6           |                       |       |      |               |                       |       |           |               |                       |         |           |               |                       |      |           |               |                       |       | 43.7 | -1.6    | -3.5  | -3.5  | -5.6 | -5.6  |       |       |       |       |      |      |
|            | 6.2           |                       |       |      |               |                       |       |           |               |                       |         |           |               |                       |      |           |               |                       |       | 12.1 | 0.1     | 3.2   | 3.2   | 2.4  | 2.4   |       |       |       |       |      |      |
| 0.0015 μM  | -5.1          | -0.074                | 3.6   | 17.3 | 17.3          | 14.7                  | 2.1   | 0.0015 μM | 0.6           | -1.3                  | 2.3     | 0.0015 μM | -1.5          | 0.32                  | 2.1  | 0.0015 μM | 0.3           | 0.33                  | 1.7   |      |         |       |       |      |       |       |       |       |       |      |      |
|            | 3.4           |                       |       |      |               |                       |       |           |               |                       |         |           |               |                       |      |           |               |                       |       | 14.8 | -4.6    | -0.7  | -0.7  | -1.7 | -1.7  |       |       |       |       |      |      |
|            | 1.5           |                       |       |      |               |                       |       |           |               |                       |         |           |               |                       |      |           |               |                       |       | 14.8 | -4.6    | -0.7  | -0.7  | -1.7 | -1.7  |       |       |       |       |      |      |

\*: ART, artemisinin; AV, atovaquone; CQ, chloroquine; MQ, mefloquine; and PYR, pyrimethamine  
 \*\*: SD, standard deviation
